# Supplementary material
Source: PubMed Central journal article supplement (PMC6754266)
Supplement: NIHMS1048973-supplement-Supplemental_figures_and_tables.pdf [file NIHMS1048973-supplement-Supplemental_figures_and_tables.pdf]

**Cell Stem Cell, Volume 25**

**Supplemental Information**

**Cardiac Reprogramming Factors**

**Synergistically Activate Genome-wide**

**Cardiogenic Stage-Specific Enhancers**

**Hisayuki Hashimoto, Zhaoning Wang, Glynnis A. Garry, Venkat S. Malladi, Giovanni A. Botten, Wenduo Ye, Huanyu Zhou, Marco Osterwalder, Diane E. Dickel, Axel Visel, Ning Liu, Rhonda Bassel-Duby, and Eric N. Olson**

## Supplemental Information

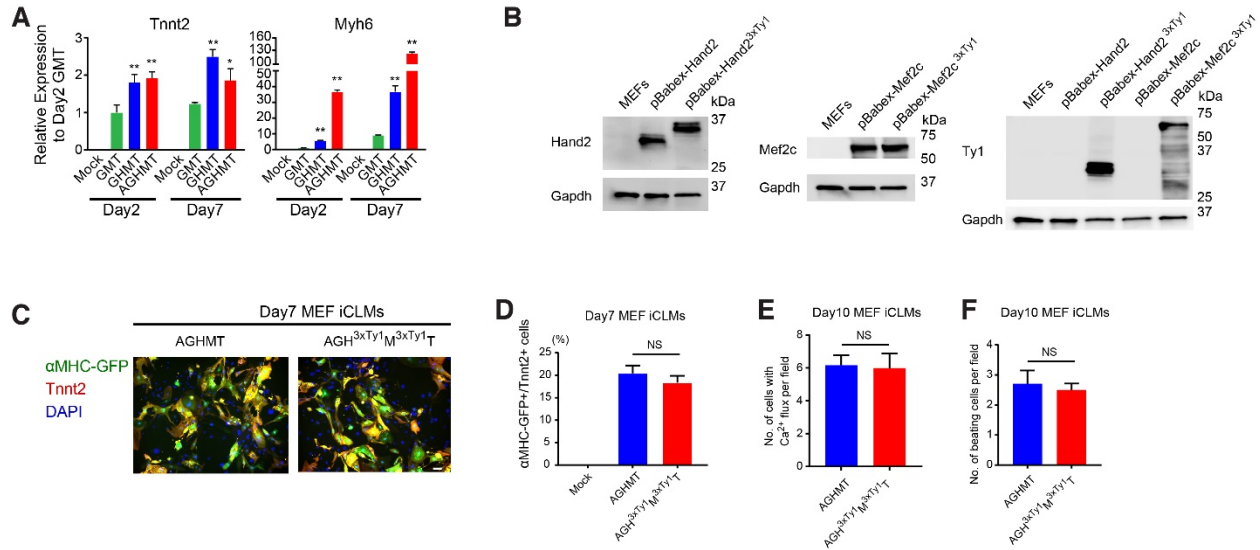

**Figure S1, related to Figure 1. Cardiac Reprogramming by Tagged Reprogramming Factors.**

(A) Transcript levels of Tnnt2 and Myh6 were increased 2 days after induction by adding Hand2 and Akt1 to GMT in MEFs. Transcript levels are normalized to Gapdh (n = 3, independent experiments). (\*  $P < 0.05$  vs. GMT, \*\*  $P < 0.01$  vs. GMT). Data represented as mean  $\pm$  SD.

(B) Western blot of 3xTy1 tagged Hand2 and Mef2c expressed in HEK293 cells.

(C) Representative immunocytochemistry images of day 7  $\alpha$ MHC-GFP transgenic MEFs treated with AGHMT or AGH<sup>3xTy1</sup>M<sup>3xTy1T</sup>. Cells were fixed and stained for  $\alpha$ MHC-GFP (green), Tnnt2 (red), and DAPI (blue) 7 days after infection. Bars, 100  $\mu$ m.

(D) Quantification by flow cytometry of  $\alpha$ MHC-GFP<sup>+</sup> and Tnnt2<sup>+</sup> iCLMs 7 days after infection with AGHMT or AGH<sup>3xTy1</sup>M<sup>3xTy1T</sup> (n = 3, independent experiments). Data represented as mean  $\pm$  SD.

(E) Quantification of Ca<sup>2+</sup> flux-positive MEFs after 10 days of reprogramming using Fluo-4 NW dye (n = 3, independent experiments). Data represented as mean  $\pm$  SD.

(F) Quantification of spontaneous beating iCLMs 10 days after reprogramming (n = 3, independent experiments). Data represented as mean  $\pm$  SD.

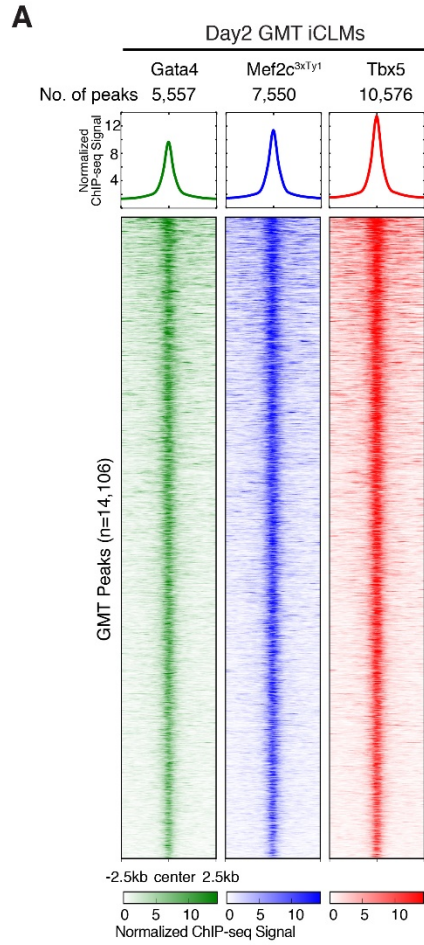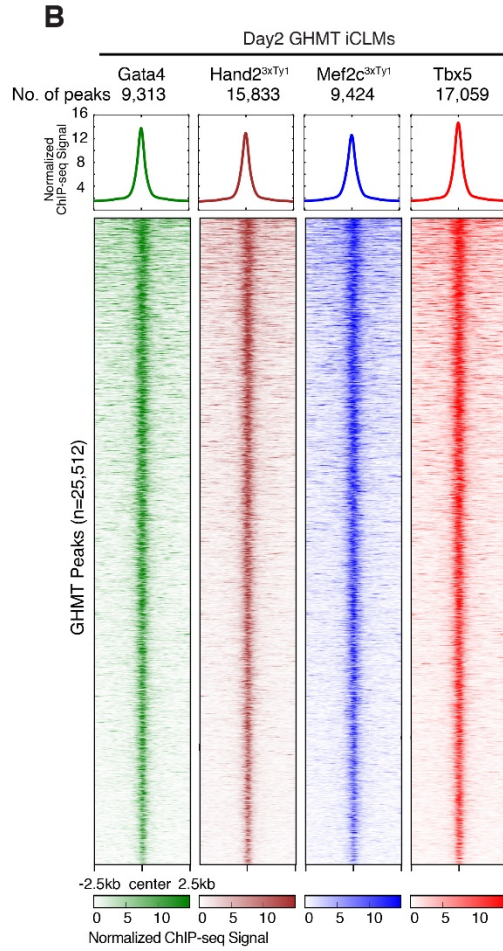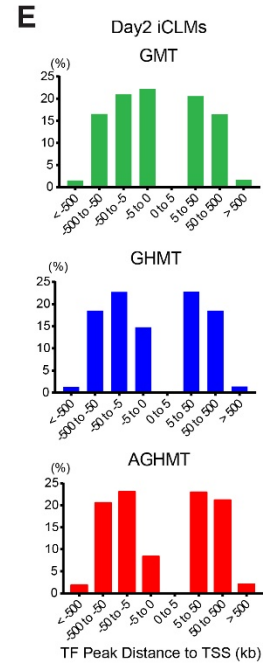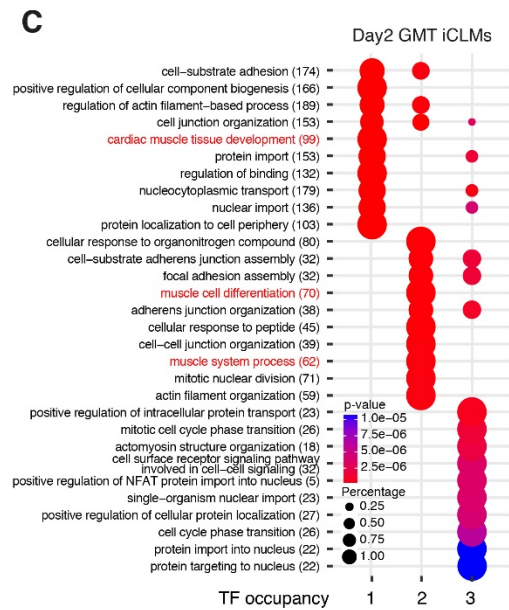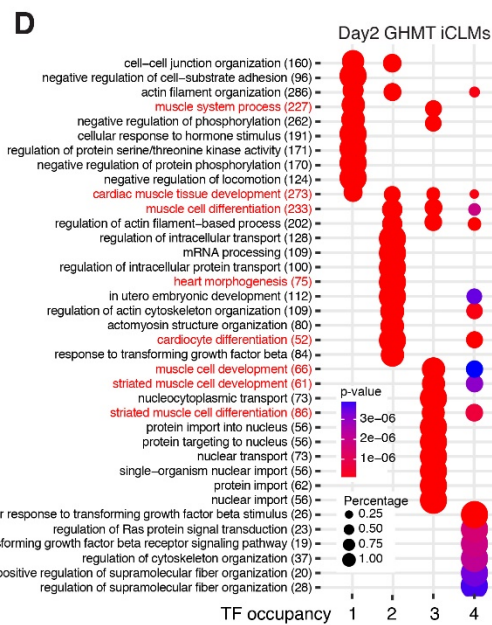

**Figure S2, related to Figure 1. Genome-wide Co-occupancy of Reprogramming Factors in GMT and GHMT iCLMs.**

(A,B) ChIP-seq data for Gata4, Mef2c, and Tbx5 reveals co-occupancy at 14,106 genomic binding sites 2 days following GMT-mediated reprogramming of MEFs (A). ChIP-seq data for Gata4, Mef2c, Hand2, and Tbx5 reveals co-occupancy at 25,512 genomic binding sites 2 days following GHMT-mediated reprogramming of MEFs (B). Normalized ChIP-seq binding profiles for TF in each cluster are shown.

(C,D) Each TF peak in GMT (C) or GHMT (D) MEF iCLMs was annotated to the nearest neighboring gene. GO enrichment analysis for biological process was performed with DAVID (v6.8). clusterProfiler (v3.6.0) was used to visualize GO term enrichment from different groups based on the number of occupying TFs. Terms related to heart or muscle are highlighted in red.

(E) Percentage of TF peaks in GMT, GHMT, and AGHMT iCLMs categorized by the distance to TSS.

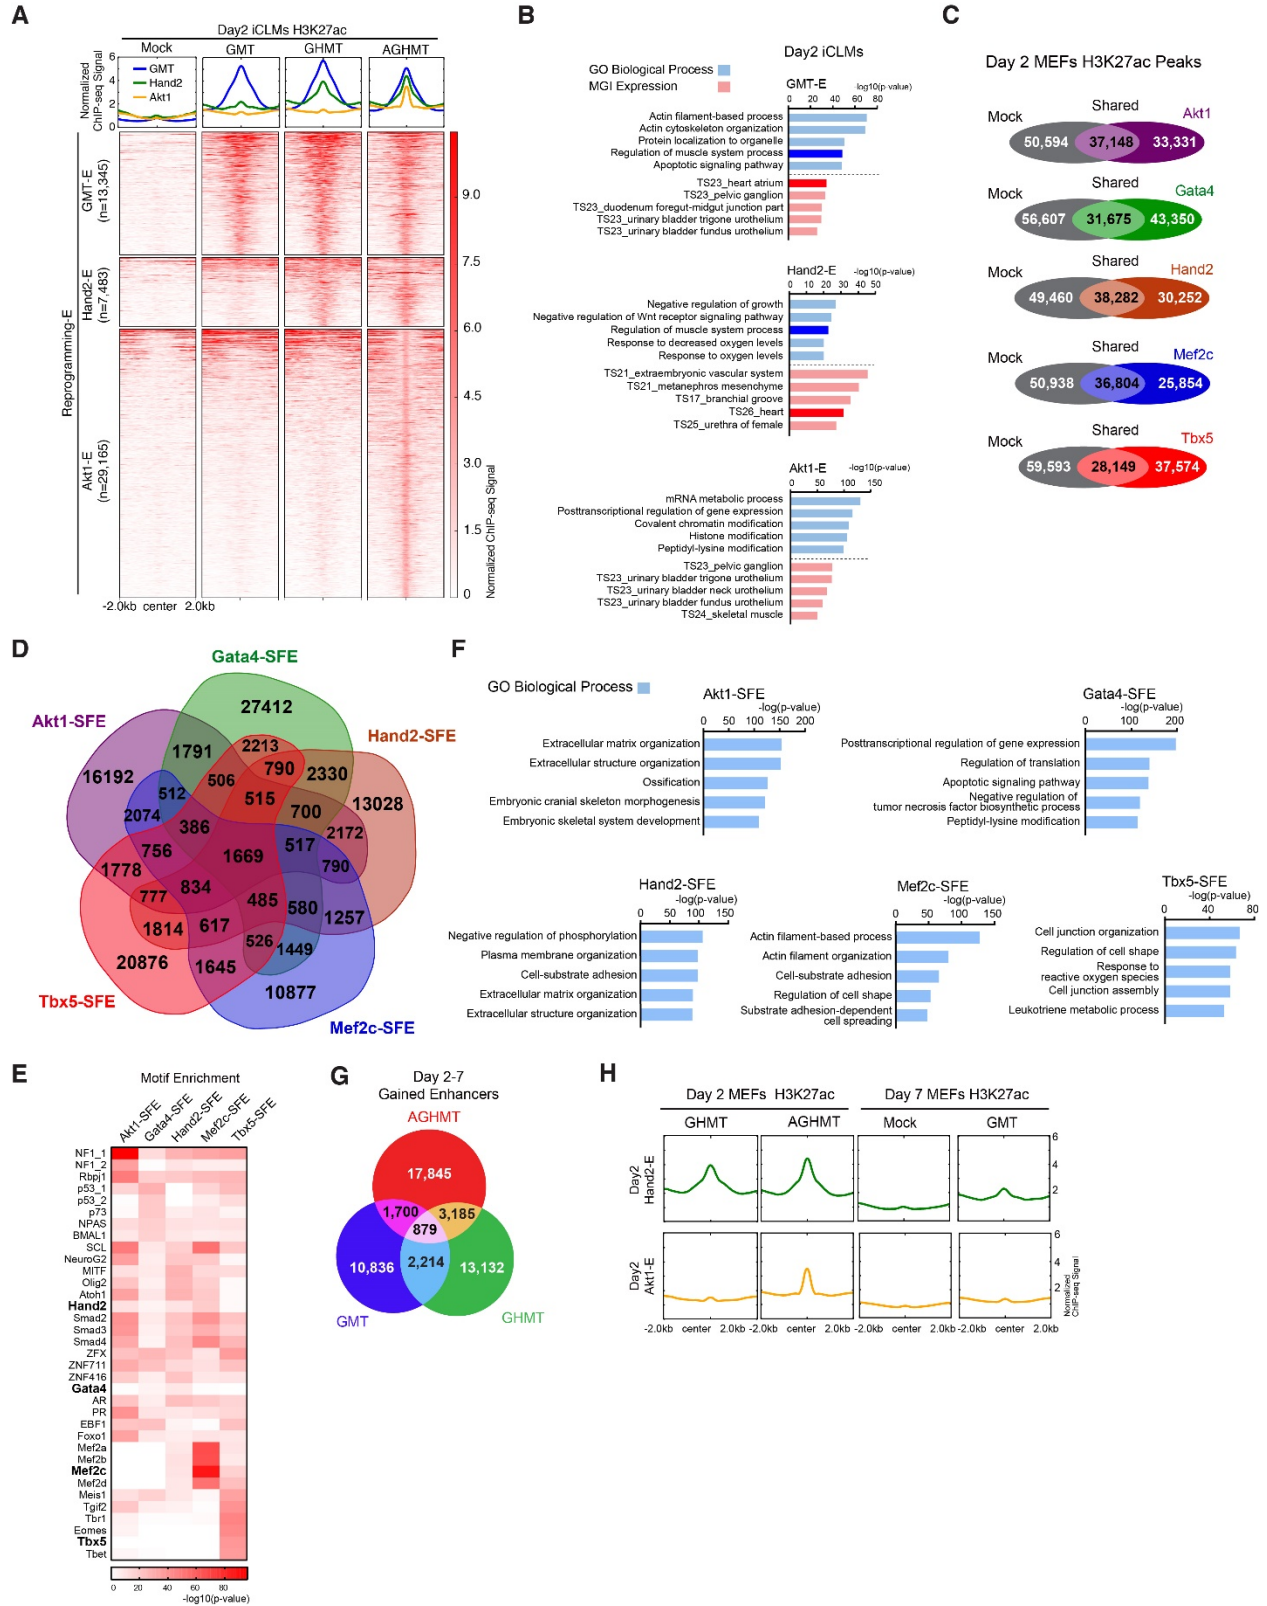

**Figure S3, related to Figure 2. Reprogramming Enhancer Activation Requires Cooperative Actions of Reprogramming Factors.**

(A) Heatmap of H3K27ac ChIP-seq signals in Reprogramming-E peaks for day 2 Mock-infected MEFs, GMT-, GHMT-, or AGHMT-iCLMs using a 4kb-window. H3K27ac ChIP-seq signals in the Reprogramming-E peaks from (Figure 2A) were clustered into three groups depending on their response to GMT (GMT-E), GHMT (Hand2-E), and AGHMT (Akt1-E). Normalized ChIP-seq binding profiles for H3K27ac in each cluster are shown.

(B) H3K27ac enhancer peaks of day 2 reprogramming enhancers were functionally annotated using GREAT. Five of the most overrepresented terms belonging to the GO Biological Process (blue) and MGI Expression (red) in each enhancer cluster are shown. Terms related to heart or muscle are highlighted in dark colors.

(C) Venn diagrams showing the number of overlapping H3K27ac enhancer peaks between Mock and each single factor overexpressing MEFs.

(D) Venn diagram showing the number of overlapping H3K27ac peaks among each SFE region.

(E) Heatmap of known motifs enriched in each SFE region. Reprogramming TFs are in bold.

(F) H3K27ac peaks of each single factor overexpressing MEFs were functionally annotated using GREAT. Five of the most overrepresented terms belonging to the GO Biological Process are shown.

(G) Venn diagrams showing the number of overlapping H3K27ac peaks of gained enhancers between day 2 and 7 in GMT, GHMT, and AGHMT iCLMs.

(H) Normalized ChIP-seq binding profiles for H3K27ac in day 2 GHMT and AGHMT iCLMs and day 7 Mock and GMT iCLMs at day 2 Hand2-E and Akt1-E regions from (A).



**A**

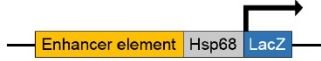

**B**

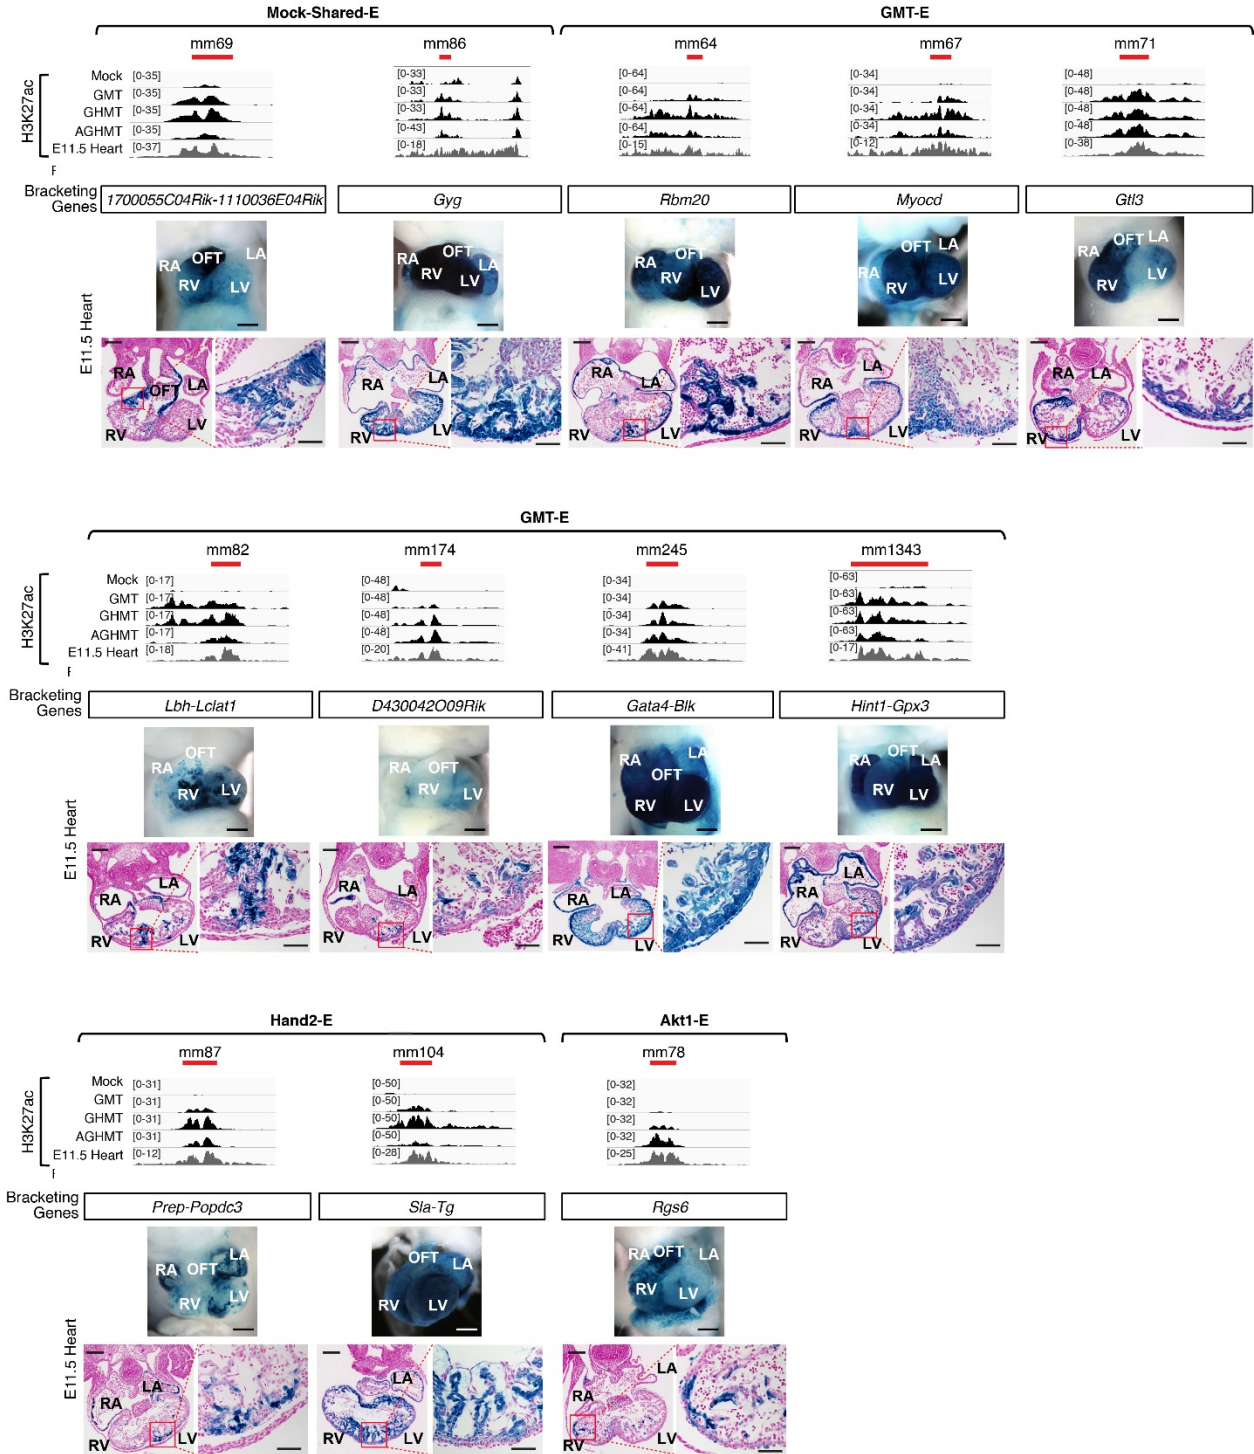

**Figure S4, related to Figure 4. iCLM Enhancers Display Specific Expression Patterns in the Developing Heart.**

(A) Schematic of Hsp68-LacZ construct for transgenic enhancer reporter assay.

(B) Cardiac subregional specificities of additional iCLM enhancers as shown in Figure 4B.

(Black scale bars: 500 $\mu$ m for whole mount heart, 200 $\mu$ m and 50 $\mu$ m for low and high magnification histology sections, respectively)



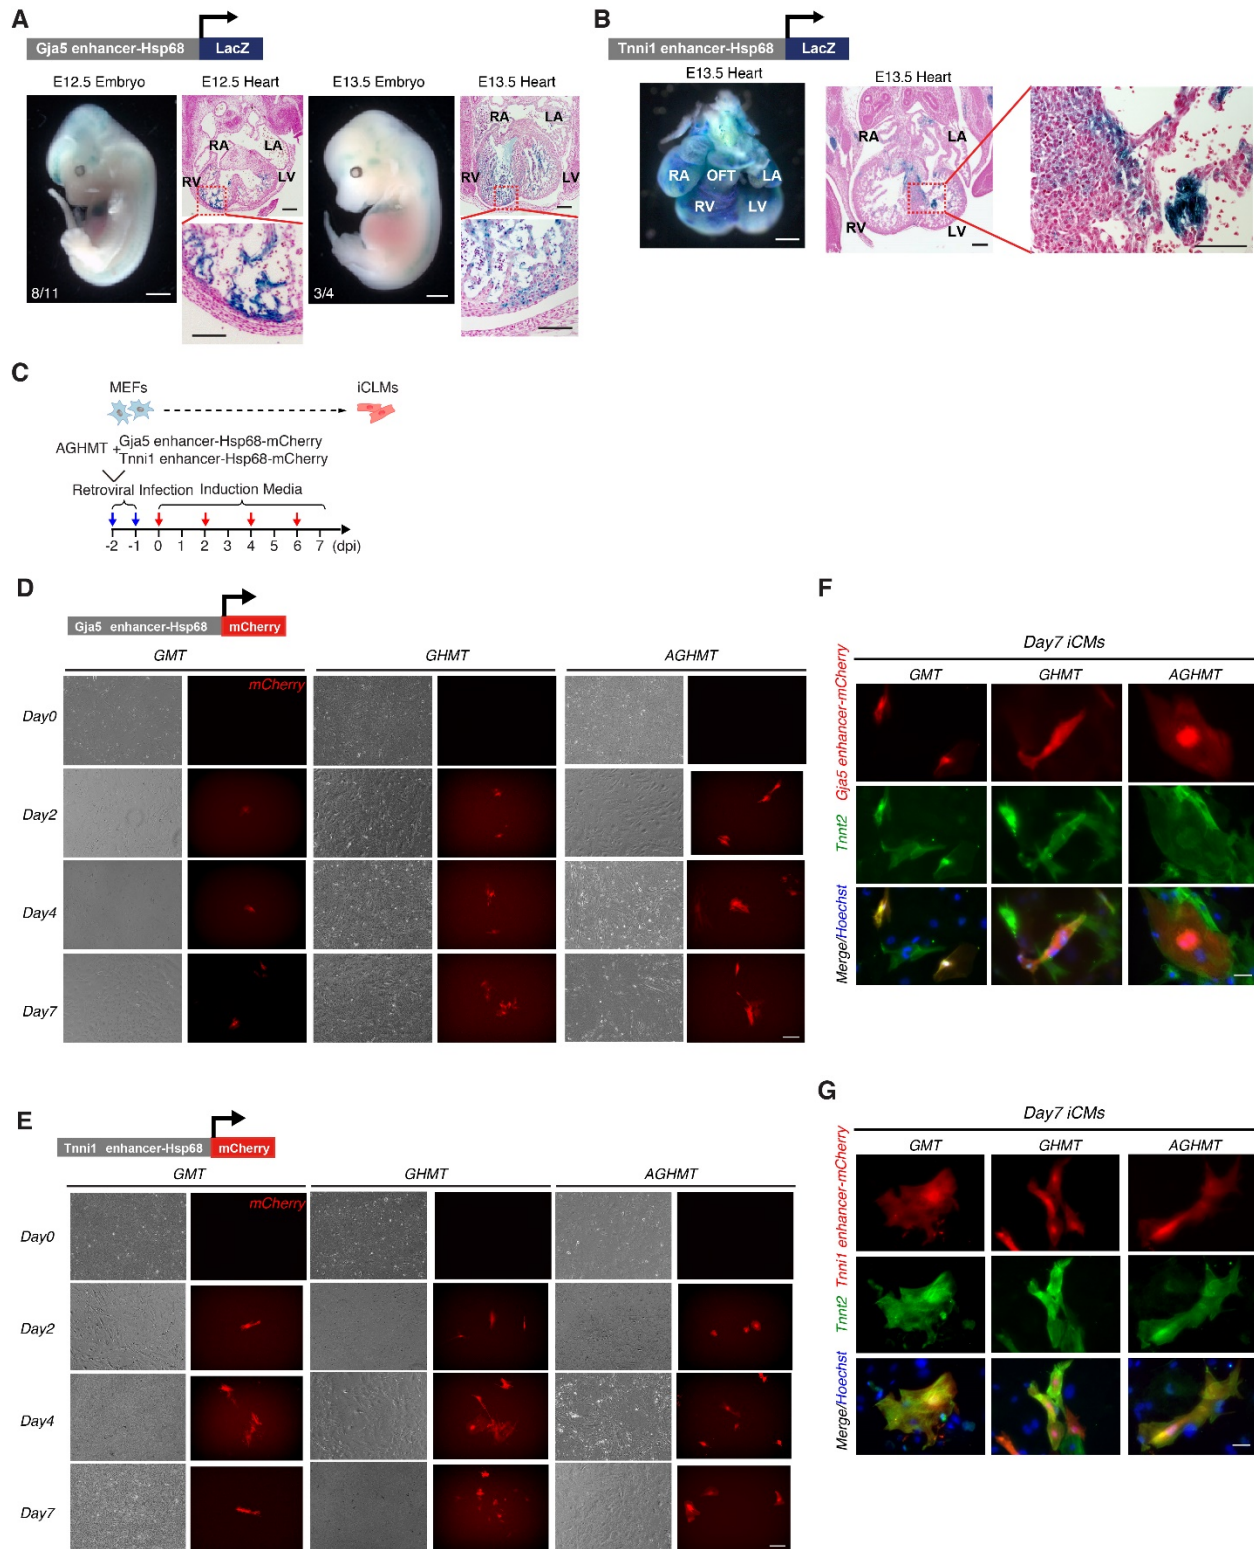

**Figure S5, related to Figure 4. Putative *Gja5* and *Tnni1* Enhancer Activity at Different Stages of Embryonic Development and Reprogramming.**

(A) Gross images of *Gja5*-E-Hsp68-LacZ transgenic whole embryos stained with  $\beta$ -galactosidase at E12.5 and E13.5. Section of E12.5 and E13.5 *Gja5*-E-Hsp68-LacZ transgenic heart counter-stained with Nuclear Fast Red showing expression of LacZ in the myocardium. Numbers indicate embryos with cardiac expression over the total LacZ+ genotyped embryos. (White scale bars: 1mm, Black scale bars: 200 $\mu$ m and 50 $\mu$ m for low and high magnification histology sections, respectively).

(B) Representative image of *Tnni1*-E-Hsp68-LacZ E13.5 transgenic heart stained with  $\beta$ -galactosidase showing LacZ expression in the heart (White scale bar: 500 $\mu$ m). Section of *Tnni1*-E-Hsp68-LacZ E13.5 transgenic heart stained with Nuclear Fast Red showing LacZ expression in the myocardium (Black scale bars: 200 $\mu$ m and 50 $\mu$ m for low and high magnification histology sections, respectively).

(C) Strategy for testing enhancer activity during direct cardiac reprogramming in MEFs. *Gja5*-E-Hsp68-mCherry or *Tnni1*-E-Hsp68-mCherry was retrovirally delivered to MEFs along with the reprogramming factors. (dpi, days post induction)

(D,E) Representative live cell images of day 0, 2, 4 and 7 *Gja5*-E-Hsp68-mCherry (D) or *Tnni1*-E-Hsp68-mCherry (E) iCLMs in different reprogramming cocktails showing mCherry expression. (Bars, 200 $\mu$ m).

(F,G) Representative immunocytochemistry images of GMT, GHMT and AGHMT iCLMs expressing mCherry under *Gja5*-E (F) or *Tnni1*-E (G) activity. Cells were fixed and stained for *Tnnt2* (green), mCherry (red), and Hoechst (blue) 7 days after infection. (Bars, 50 $\mu$ m).

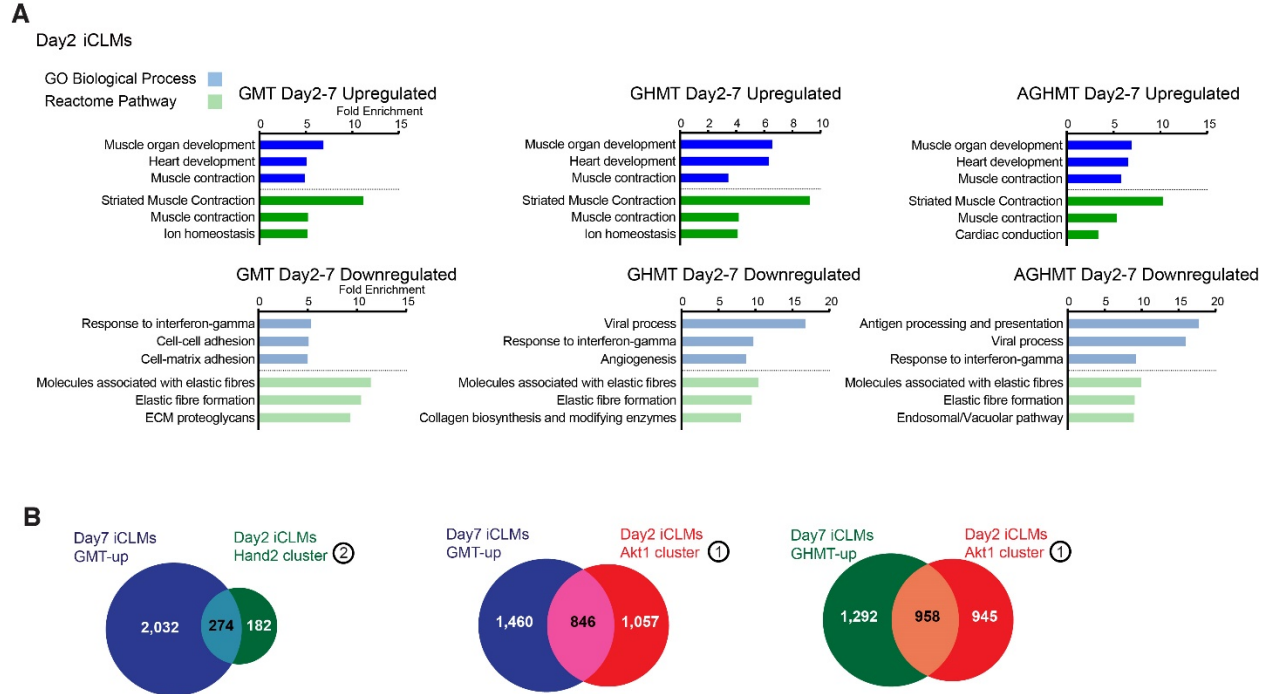

**Figure S6, related to Figure 5. Time Dependent Activation of Cardiac Genes during Cardiac Reprogramming.**

(A) Functional annotation of gene sets changing between day 2 and 7 iCLMs was performed by PANTHER and the three most overrepresented GO Biological Process (blue) and Reactome Pathway (green) terms are shown. Gene sets upregulated show high enrichment of terms related to heart or muscle development and contraction, which are highlighted in dark colors.

(B) Venn diagrams showing the number of overlapping genes between the upregulated genes in day 7 GMT and GHMT iCLMs with day 2 iCLM Hand2 and Akt1 cluster from (Figure 5E).

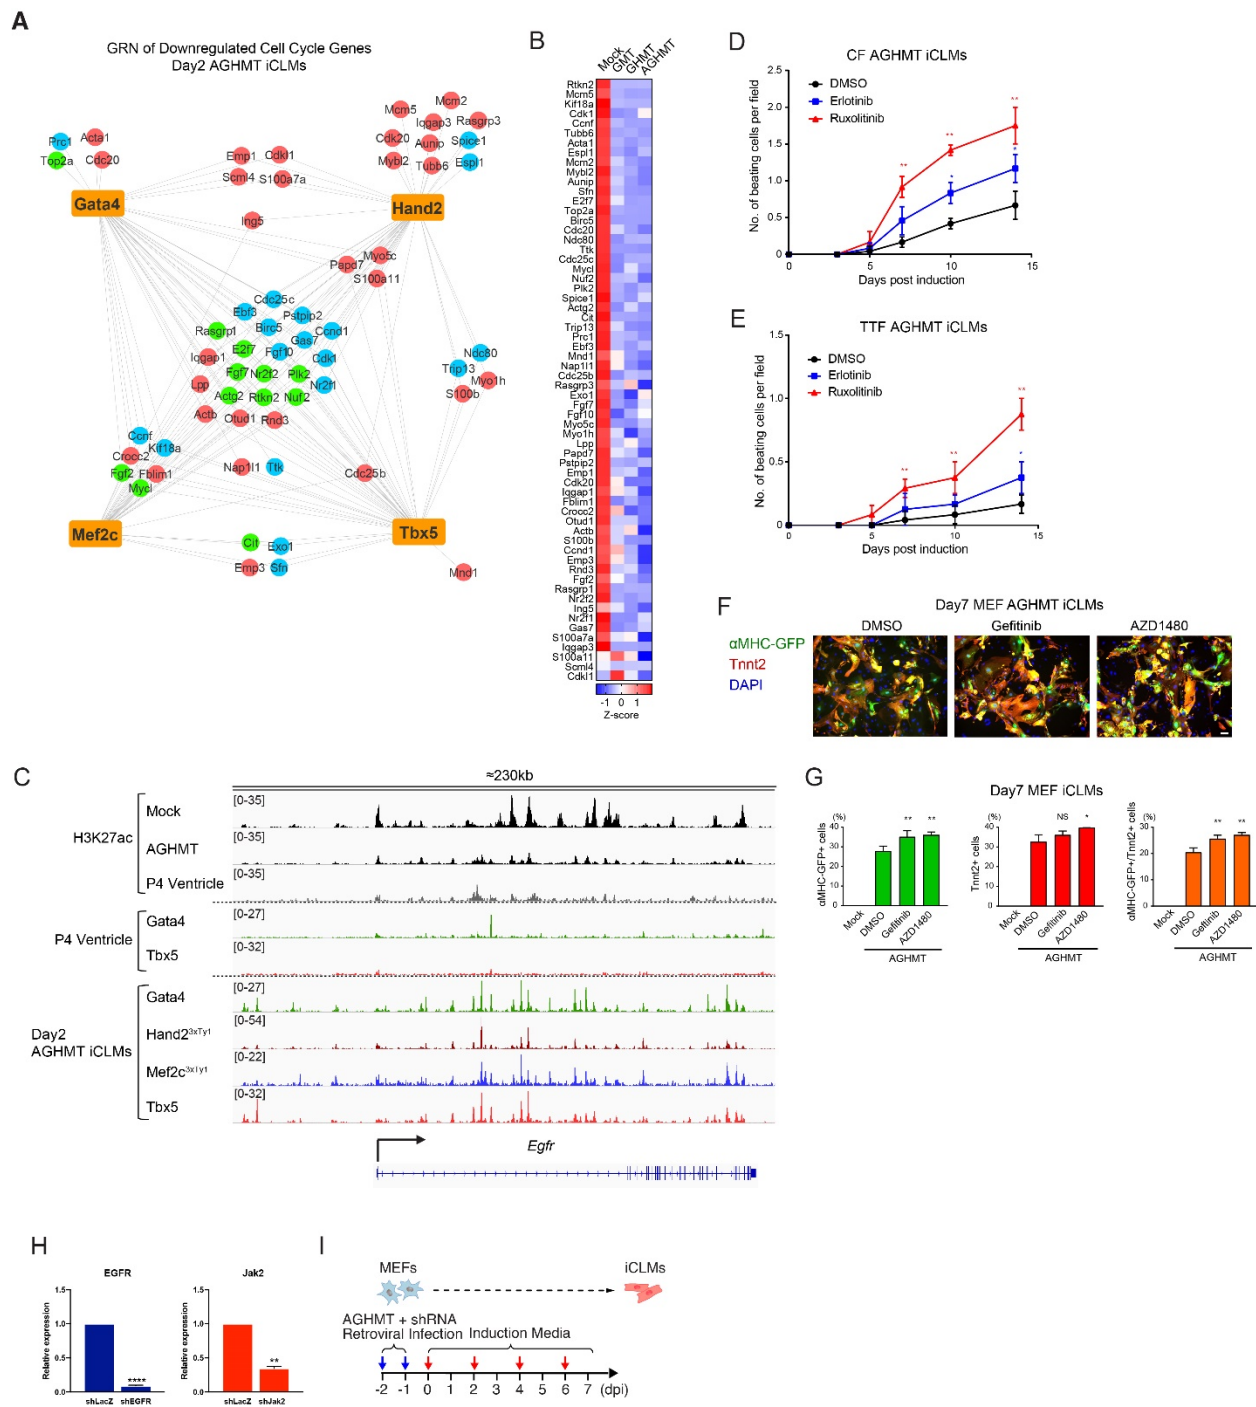

**Figure S7, related to Figure 7. Suppression of Cell Cycle Related Genes during Reprogramming.**

(A) GRN of downregulated cell cycle pathway genes in day 2 AGHMT iCLMs. Each node represents a gene and edges are drawn to all the annotated genes of reprogramming TF peaks.

(B) Gene expression heatmap of all genes from (A).

(C) A genome browser view of the *Egfr* locus showing multiple unique TF peaks and dampening of H3K27ac signal in AGHMT iCLMs.

(D,E) Quantification of spontaneous beating CF (D) and TTF (E) iCLMs after treatment (n=3, independent experiments). (\*  $P < 0.05$  vs. AGHMT+DMSO, \*\*  $P < 0.01$  vs. AGHMT+DMSO). Data represented as mean  $\pm$  SD.

(F) Representative immunocytochemistry images of AGHMT reprogrammed fibroblasts from  $\alpha$ MHC-GFP transgenic mice treated with DMSO or the indicated chemicals. Cells were fixed and stained for  $\alpha$ MHC-GFP (green), *Tnnt2* (red), and DAPI (blue) 7 days after infection. (Bars, 100 $\mu$ m).

(G) Quantification by flow cytometry of  $\alpha$ MHC-GFP<sup>+</sup> and *Tnnt2*<sup>+</sup> iCLMs 7 days after treatment with AGHMT and DMSO or the indicated chemicals (n=3, independent experiments). (\*  $P < 0.05$  vs. AGHMT+DMSO, \*\*  $P < 0.01$  vs. AGHMT+DMSO). Data represented as mean  $\pm$  SD.

(H) Suppression of *Egfr* and *Jak2* transcript levels in MEFs 2 days after infection of shRNAs (n=3, independent experiments). Transcript levels are normalized to 18S. (\*\*  $P < 0.01$  vs. shLacZ, \*\*\*\*  $P < 0.0001$  vs. shLacZ). Data represented as mean  $\pm$  SD.

(I) Strategy for knockdown by shRNA during direct cardiac reprogramming in MEFs. shRNAs were retrovirally delivered to MEFs together with the reprogramming factors. (dpi, days post induction).

**Table S1, related to Figures 1 and S2. Summary of TF occupancy in day2 iCLMs.**

|        | GMT          | GHMT          | AGHMT         |
|--------|--------------|---------------|---------------|
| Single | 9372 (66.9%) | 13660 (53.6%) | 20868 (50.2%) |
| Two    | 3584 (25.6%) | 6657 (26.1%)  | 11037 (26.5%) |
| Three  | 1054 (7.5%)  | 3743 (14.7%)  | 6791 (16.3%)  |
| Four   | -            | 1447 (5.7%)   | 2900 (7.0%)   |
| Total  | 14010        | 25507         | 41596         |

TF Peaks with single TF occupancy

|       | GMT          | GHMT         | AGHMT        |
|-------|--------------|--------------|--------------|
| Gata4 | 1613 (17.2%) | 1769 (13.0%) | 7037 (33.7%) |
| Hand2 | -            | 4531 (33.2%) | 5901 (28.3%) |
| Mef2c | 3362 (35.9%) | 2506 (18.3%) | 2125 (10.2%) |
| Tbx5  | 4397 (46.9%) | 4854 (35.5%) | 5805 (27.8%) |
| Total | 9372         | 13660        | 20868        |

TF Peaks with two TF occupancy

|       | GMT          | GHMT         | AGHMT        |
|-------|--------------|--------------|--------------|
| GM    | 480 (13.4%)  | 332 (5.0%)   | 786 (7.1%)   |
| GT    | 1663 (46.4%) | 1260 (19.0%) | 4471 (40.5%) |
| MT    | 1441 (40.2%) | 838 (12.6%)  | 781 (7.1%)   |
| GH    | -            | 859 (12.9%)  | 1609 (14.6%) |
| HM    | -            | 1011 (15.2%) | 584 (5.3%)   |
| HT    | -            | 2357 (35.4%) | 2806 (25.4%) |
| Total | 3584         | 6657         | 11037        |

TF Peaks with three TF occupancy

|       | GMT         | GHMT         | AGHMT        |
|-------|-------------|--------------|--------------|
| GMT   | 1054 (100%) | 383 (10.2%)  | 1294 (19.1%) |
| GHM   | -           | 352 (9.4%)   | 421 (6.2%)   |
| GHT   | -           | 1793 (47.9%) | 4401 (64.8%) |
| HMT   | -           | 1215 (32.5%) | 675 (9.9%)   |
| Total | 1054        | 3743         | 6791         |

TF Peaks with four TF occupancy

|      | GMT | GHMT | AGHMT |
|------|-----|------|-------|
| GHMT | -   | 1447 | 2900  |



**Table S2, related to Figure 2. Known motifs recovered from reprogramming enhancers in day 2 iCLMs.** Percent of target describes the frequency of motifs discovered at the target sites. Reprogramming TFs are highlighted in bold.

| Symbol       | Motif              | GMT-Enhancer P-Value | GMT-Enhancer % of Targets | Hand2-Enhancer P-Value | Hand2-Enhancer % of Targets | Akt1-Enhancer P-Value | Akt1-Enhancer % of Targets |
|--------------|--------------------|----------------------|---------------------------|------------------------|-----------------------------|-----------------------|----------------------------|
| Nfib         | NF1-halfsite(CTF)  | 1.00E-14             | 18.54                     | 1.00E-09               | 20.41                       | 1.00E-20              | 18.55                      |
| Meis1        | Meis1(Homeobox)    | 1.00E-15             | 20.24                     | 0.001                  | 20.23                       | 1.00E-17              | 19.31                      |
| Tgif1        | Tgif1(Homeobox)    | 1.00E-14             | 36.1                      | 1.00E-06               | 36.62                       | 1.00E-17              | 34.45                      |
| Tgif2        | Tgif2(Homeobox)    | 1.00E-11             | 37.48                     | 1.00E-08               | 38.69                       | 1.00E-14              | 36.33                      |
| Smad2        | Smad2(MAD)         | 1.00E-13             | 17.11                     | 1.00E-08               | 19.79                       | 1.00E-14              | 16.4                       |
| Smad3        | Smad3(MAD)         | 1.00E-12             | 32.49                     | 1.00E-07               | 36.67                       | 1.00E-08              | 31.42                      |
| Smad4        | Smad4(MAD)         | 1.00E-16             | 17.4                      | 1.00E-11               | 20.61                       | 1.00E-13              | 16.74                      |
| Mef2a        | Mef2a(MADS)        | 1.00E-122            | 8.22                      | 1.00E-27               | 6.16                        | 1.00E-24              | 4.56                       |
| Mef2b        | Mef2b(MADS)        | 1.00E-160            | 14.56                     | 1.00E-34               | 11.47                       | 1.00E-36              | 8.94                       |
| <b>Mef2c</b> | <b>Mef2c(MADS)</b> | <b>1.00E-132</b>     | <b>8.82</b>               | <b>1.00E-38</b>        | <b>6.8</b>                  | <b>1.00E-31</b>       | <b>5.04</b>                |
| Mef2d        | Mef2d(MADS)        | 1.00E-104            | 4.69                      | 1.00E-26               | 3.07                        | 1.00E-29              | 2.29                       |
| Ar           | AR-halfsite(NR)    | 1.00E-11             | 42                        | 0.001                  | 46.64                       | 1.00E-16              | 42.48                      |
| Stat4        | STAT4(Stat)        | 0.0001               | 10.16                     | 1.00E-06               | 11.29                       | 0.001                 | 9.94                       |
| <b>Tbx5</b>  | <b>Tbx5(T-box)</b> | <b>1.00E-16</b>      | <b>34.43</b>              | <b>1.00E-06</b>        | <b>36.86</b>                | <b>0.001</b>          | <b>32.28</b>               |
| Gata3        | GATA3(Zf)          | 1.00E-65             | 21.27                     | 1.00E-31               | 20.01                       | 0.001                 | 15.29                      |
| Gata1        | Gata1(Zf)          | 1.00E-34             | 8.45                      | 1.00E-20               | 7.95                        | 0.001                 | 5.75                       |
| <b>Gata4</b> | <b>Gata4(Zf)</b>   | <b>1.00E-51</b>      | <b>14.39</b>              | <b>1.00E-25</b>        | <b>13.4</b>                 | <b>1.00E-06</b>       | <b>10.17</b>               |
| Gata6        | Gata6(Zf)          | 1.00E-56             | 13.43                     | 1.00E-26               | 12.37                       | 1.00E-06              | 9.35                       |
| Zfp711       | ZNF711(Zf)         | 1.00E-07             | 14.64                     | 0.0001                 | 17.67                       | 1.00E-28              | 16.42                      |
| Zfx          | ZFX(Zf)            | 1.00E-08             | 11.86                     | 1.00E-05               | 13.75                       | 1.00E-33              | 13.26                      |
| Atoh1        | Atoh1(bHLH)        | 1.00E-06             | 11.29                     | 1.00E-15               | 14.25                       | 1.00E-11              | 11.66                      |
| <b>Hand2</b> | <b>Hand2(bHLH)</b> | <b>1.00E-13</b>      | <b>6.19</b>               | <b>1.00E-20</b>        | <b>7.58</b>                 | <b>1.00E-09</b>       | <b>5.53</b>                |
| Myod1        | MyoD(bHLH)         | 0.0001               | 7.9                       | 1.00E-07               | 8.67                        | 0.001                 | 7.94                       |
| Neurod1      | NeuroD1(bHLH)      | 0.0001               | 8.36                      | 1.00E-07               | 10.44                       | 1.00E-07              | 8.48                       |
| Neurog2      | NeuroG2(bHLH)      | 1.00E-07             | 16.52                     | 1.00E-11               | 19.66                       | 1.00E-13              | 16.8                       |
| Olig2        | Olig2(bHLH)        | 1.00E-07             | 20.91                     | 1.00E-07               | 24.51                       | 1.00E-09              | 20.65                      |
| Tal1         | SCL(bHLH)          | 1.00E-08             | 46.44                     | 1.00E-05               | 51.33                       | 1.00E-20              | 47.33                      |
| Tfap4        | Ap4(bHLH)          | 1.00E-07             | 12.84                     | 0.0001                 | 14.49                       | 1.00E-07              | 12.83                      |
| Rbpj         | Rbpj1              | 1.00E-09             | 15.55                     | 1.00E-07               | 16.74                       | 1.00E-05              | 15.02                      |

**Table S3, related to Figure 2. Known motifs recovered from enhancers gained by day 7 compared to day 2 iCLMs. Percentage of targets describes the frequency of motifs discovered at the target sites. Reprogramming TFs are highlighted in bold.**

| Symbol       | Motif              | GMT P-Value     | GMT % of Targets | GHMT P-Value    | GHMT % of Targets | AGHMT P-Value   | AGHMT % of Targets |
|--------------|--------------------|-----------------|------------------|-----------------|-------------------|-----------------|--------------------|
| Ar           | AR-halvesite(NR)   | 1.00E-05        | 36.83            | 1.00E-05        | 37.7              | 1.00E-05        | 36                 |
| Bapx1        | Bapx1(Homeobox)    | 0.1             | 19.66            | 1               | 19.72             | 1.00E-06        | 20.05              |
| Nr2f2        | COUP-TFII(NR)      | 0.01            | 14.11            | 0.01            | 14.54             | 1.00E-06        | 14.02              |
| Ctcf         | CTCF(Zf)           | 1.00E-09        | 1.06             | 0.1             | 0.83              | 0.1             | 0.61               |
| Esrra        | Esrra(NR)          | 1.00E-06        | 18.62            | 1.00E-06        | 19.14             | 1.00E-06        | 18.13              |
| Esrrb        | Esrrb(NR)          | 1.00E-05        | 5.96             | 0.0001          | 5.89              | 1.00E-09        | 5.92               |
| Gata1        | Gata1(Zf)          | 1.00E-06        | 6.66             | 1.00E-05        | 6.19              | 0.01            | 6.03               |
| Gata2        | Gata2(Zf)          | 0.0001          | 7.45             | 1.00E-05        | 7.13              | 0.01            | 6.92               |
| <b>Gata4</b> | <b>Gata4(Zf)</b>   | <b>1.00E-07</b> | <b>11.86</b>     | <b>0.001</b>    | <b>10.92</b>      | <b>0.001</b>    | <b>11.2</b>        |
| Gata6        | Gata6(Zf)          | 1.00E-06        | 10.96            | 0.01            | 9.92              | 0.01            | 10.15              |
| Mef2a        | Mef2a(MADS)        | 1.00E-18        | 5.84             | 1.00E-29        | 5.69              | 1.00E-35        | 6.16               |
| Mef2b        | Mef2b(MADS)        | 1.00E-35        | 11.49            | 1.00E-27        | 10.62             | 1.00E-50        | 11.82              |
| <b>Mef2c</b> | <b>Mef2c(MADS)</b> | <b>1.00E-35</b> | <b>6.9</b>       | <b>1.00E-28</b> | <b>6.04</b>       | <b>1.00E-38</b> | <b>6.73</b>        |
| Mef2d        | Mef2d(MADS)        | 1.00E-31        | 3.23             | 1.00E-20        | 2.88              | 1.00E-32        | 3.14               |
| Nfib         | NF1(CTF)           | 0.001           | 2.76             | 1.00E-06        | 2.96              | 0.1             | 2.4                |
| Sox15        | Sox15(HMG)         | 1               | 11.35            | 1               | 10.99             | 1.00E-09        | 12.08              |
| Thrb         | THRb(NR)           | 1.00E-05        | 36.81            | 1.00E-08        | 37.7              | 1.00E-09        | 36.58              |
| Tlx1         | Tlx(NR)            | 1.00E-08        | 3.45             | 0.01            | 3.47              | 1               | 2.77               |
| Zfp418       | ZNF416(Zf)         | 0.0001          | 10.99            | 0.1             | 10.98             | 1.00E-07        | 10.55              |

**Table S5, related to Figures 4 and S4. List of VISTA mouse elements and Reprogramming Enhancers used to confirm *in vivo* cardiac activity by LacZ transgenic mouse assay.**

| Enhancer ID    | Enhancer coordinates (mm10) | Enhancer length(bp) | Enhancer activation dependence | TF co-occupancy dependence | Bracketing genes            |
|----------------|-----------------------------|---------------------|--------------------------------|----------------------------|-----------------------------|
| mm64           | chr19:53715915-53717934     | 2019                | GMT                            | GMT                        | Rbm20 (intragenic)          |
| mm67           | chr11:65207498-65210380     | 2882                | GMT                            | GMT                        | Myocd (intragenic)          |
| mm69           | chr9:64044784-64046949      | 2165                | GMT                            | GMT                        | 1700055C04Rik-1110036E04Rik |
| mm71           | chr8:95426508-95428314      | 1806                | GMT                            | GMT                        | Gtl3 (intragenic)           |
| mm72           | chr3:152304130-152305473    | 1343                | Mock                           | GMT                        | Fam73a (intragenic)         |
| mm78           | chr12:83072395-83074413     | 2018                | Akt1                           | Hand2                      | Rgs6 (intragenic)           |
| mm82           | chr17:73022163-73024151     | 1988                | GMT                            | GMT                        | Lbh-Lclat1                  |
| mm86           | chr3:20145236-20146308      | 1072                | Mock                           | GMT                        | Gyg (intragenic)            |
| mm87           | chr10:45228613-45231786     | 3173                | Hand2                          | GMT                        | Prep-Popdc3                 |
| mm104          | chr15:66824301-66827162     | 2861                | Hand2                          | GMT                        | Sla-Tg                      |
| mm130          | chr9:24887072-24890068      | 2996                | Hand2                          | Hand2                      | Tbx20-Herpud2               |
| mm145          | chr4:120391603-120393946    | 2343                | GMT                            | GMT                        | Foxo6-Scmh1                 |
| mm146          | chr11:77422469-77424441     | 1972                | GMT                            | GMT                        | Ssh2 (intragenic)           |
| mm152          | chr18:80330119-80332361     | 2242                | Hand2                          | Hand2                      | Kcng2 (intragenic)          |
| mm169          | chr7:80445068-80446500      | 1432                | Hand2                          | Hand2                      | Furin-Blm                   |
| mm174          | chr7:125764047-125765353    | 1306                | Hand2                          | Hand2                      | D430042O09Rik (intragenic)  |
| mm245          | chr14:63367789-63369845     | 2056                | GMT                            | GMT                        | Gata4-Blk                   |
| mm1343         | chr11:54879186-54884157     | 4971                | GMT                            | GMT                        | Hint1-Gpx3                  |
| Putative Gja5  | chr3:97062652-97063357      | 705                 | Hand2                          | Hand2                      | Gja5-Acp6                   |
| Putative Tnni1 | chr1:135800059-135801243    | 1184                | GMT                            | GMT                        | Tnni1 (intragenic)          |

**Table S6, related to Figures 6 and 7. Number of genes in each cluster of day 2 AGHMT iCLMs GRN.**

|       | Upregulated GRN | Downregulated GRN |
|-------|-----------------|-------------------|
| Gata4 | 86              | 85                |
| Hand2 | 91              | 105               |
| Mef2c | 31              | 32                |
| Tbx5  | 76              | 77                |
| GM    | 19              | 13                |
| GT    | 107             | 85                |
| MT    | 27              | 10                |
| GH    | 52              | 62                |
| HM    | 28              | 24                |
| HT    | 93              | 64                |
| GMT   | 70              | 42                |
| GHM   | 38              | 22                |
| GHT   | 332             | 265               |
| HMT   | 56              | 28                |
| GHMT  | 700             | 290               |
| Total | 1806            | 1204              |
